# Supplementary material for: Effectiveness of Vigna unguiculata seed extracts in preventing colorectal cancer
Source: Royal Society of Chemistry journal article supplement (doi:10.1039/d0fo00913j), 2020-01-01
Supplement: d0fo00913j4.pdf [file d0fo00913j4.pdf]

### Supplementary information

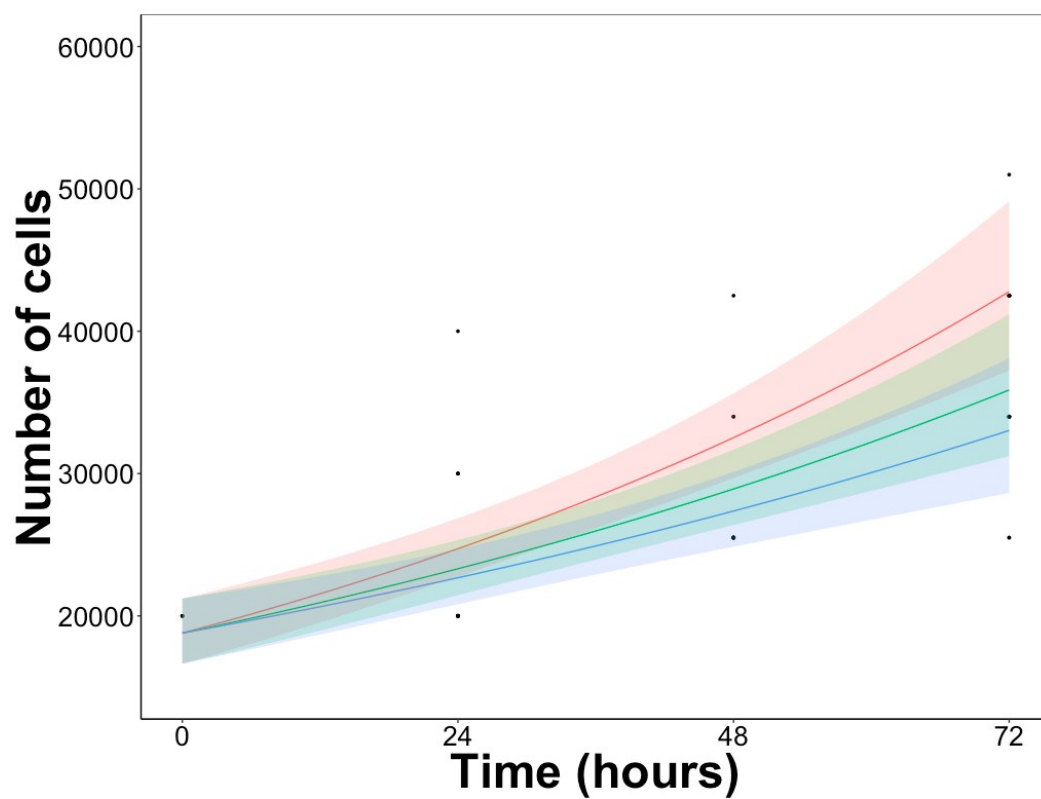

Fig. S1 CCD841 cells proliferation (see Fig. 2 for details).

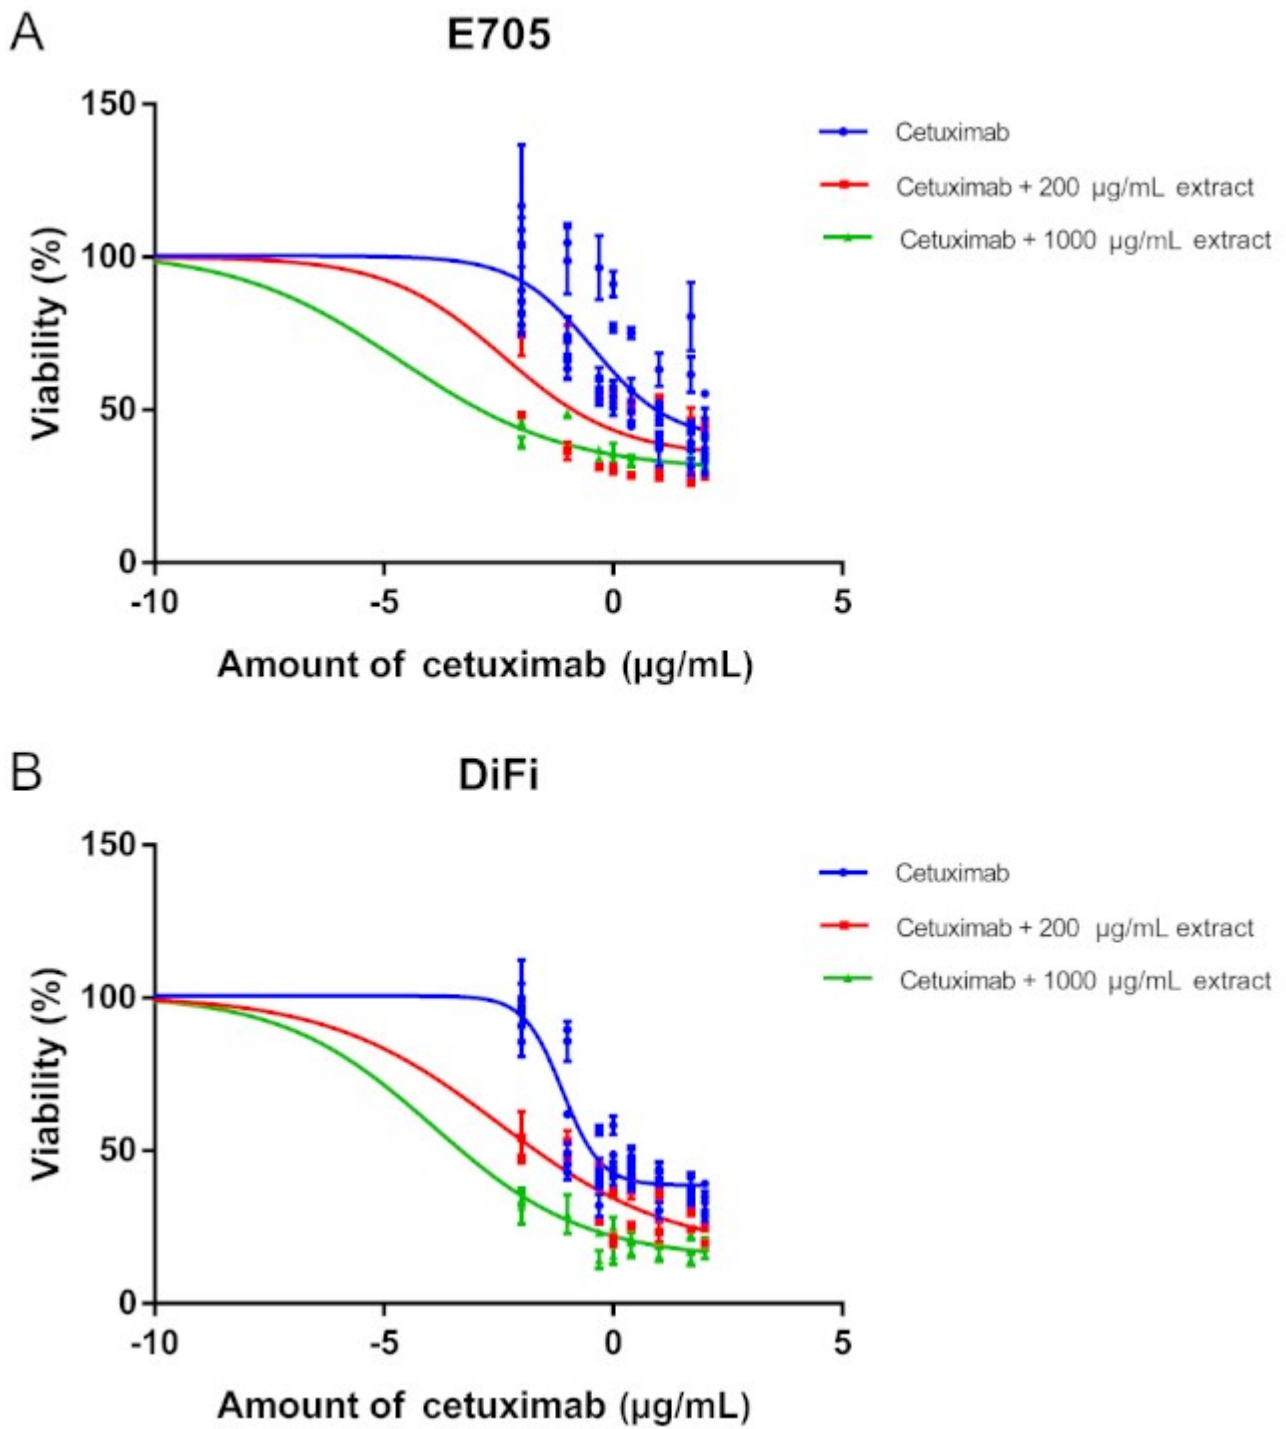

Fig. S2 Dose-response curves of E705 (A) and DiFi (B) with drug alone and drug plus two concentrations of extract.

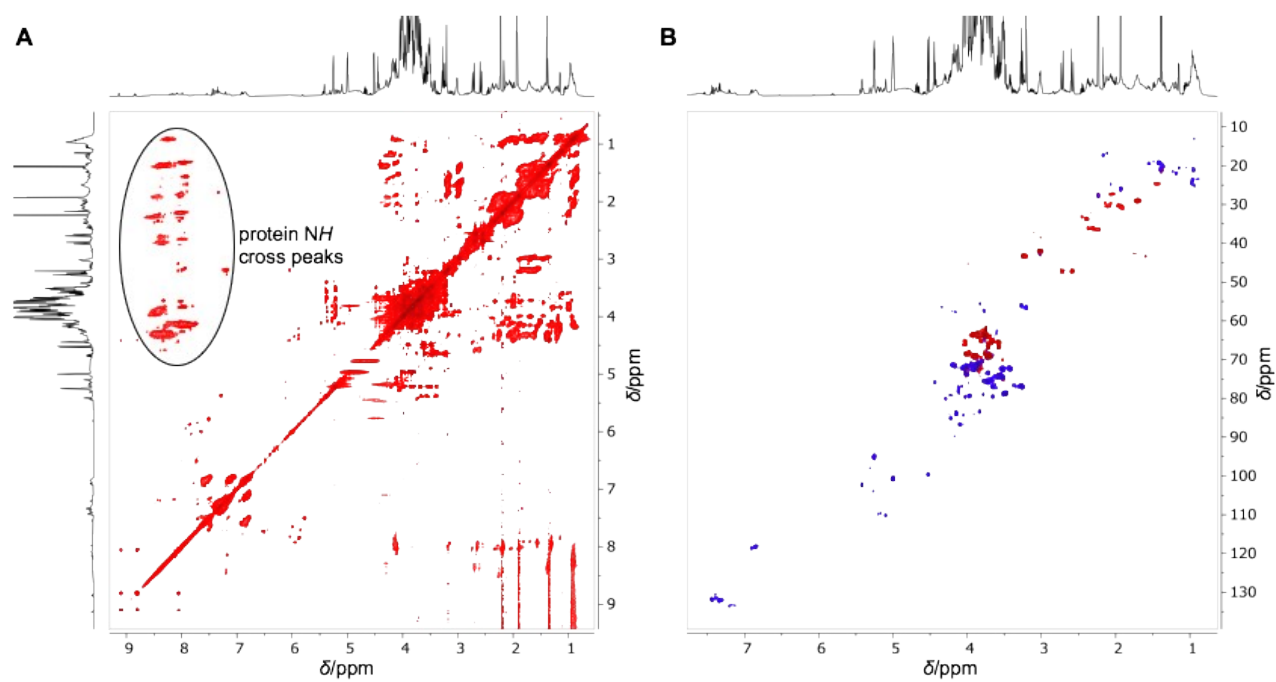

**Fig. S3**  $^1\text{H}$ - $^1\text{H}$ -TOCSY (A) and  $^1\text{H}$ - $^{13}\text{C}$  HSQC (B) spectra of a total cowpea water boiled seed extract sample dissolved in  $\text{H}_2\text{O}:\text{D}_2\text{O}$  9:1 at a final concentration of 10 mg/mL (TSP 0.5 mM, 25 °C).

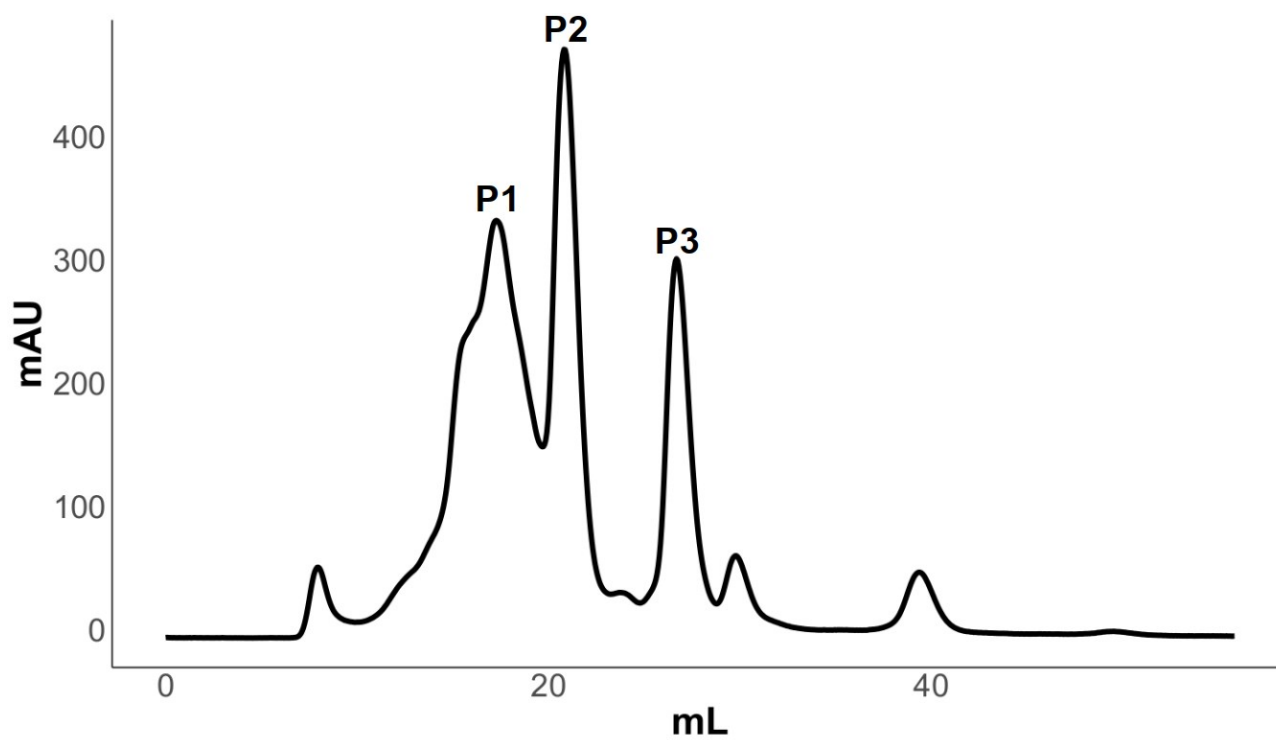

**Fig. S4** FPLC profile of the purified extract.
